# Supplementary material for: Pharmacokinetic and pharmacodynamic study of doxorubicin in children with cancer: results of a “European Pediatric Oncology Off-patents Medicines Consortium” trial
Source: PubMed Central journal article supplement (PMC5114325; doi:10.1007/s00280-016-3174-8), 2016-10-21
Supplement: 280_2016_3174_MOESM3_ESM.pdf [file 280_2016_3174_MOESM3_ESM.pdf]

### Online Resource 3

Detected SNPs in Genes involved in Doxorubicin metabolism and transport

| <b>Gene</b>     | <b>Polymorphism</b>                   | <b>Wild Type</b> | <b>Hetero-<br/>zygous</b> | <b>Homo-<br/>zygous</b> | <b>missing</b> |
|-----------------|---------------------------------------|------------------|---------------------------|-------------------------|----------------|
| <b>NQO1</b>     | <b>C609T - rs1800566</b>              | 58               | 35                        | 4                       | 1              |
|                 | <b>rs1143684</b>                      | 57               | 33                        | 7                       | 1              |
|                 | <b>insertion/deletion</b>             | 78               | 14                        | 0                       | 6              |
| <b>ABCB1</b>    | <b>rs1128503</b>                      | 32               | 46                        | 18                      | 2              |
|                 | <b>rs2032582</b>                      | 31               | 46                        | 17                      | 4              |
|                 | <b>rs1045642</b>                      | 27               | 43                        | 26                      | 2              |
| <b>SLC22A16</b> | <b>rs723685</b>                       | 73               | 22                        | 1                       | 2              |
|                 | <b>rs12210538</b>                     | 53               | 35                        | 8                       | 2              |
|                 | <b>rs714368</b>                       | 55               | 36                        | 5                       | 2              |
|                 | <b>rs6907567</b>                      | 55               | 36                        | 5                       | 2              |
| <b>CBR1</b>     | <b>rs9024</b>                         | 81               | 16                        | 1                       | 0              |
| <b>CBR3</b>     | <b>rs8133052</b>                      | 18               | 58                        | 19                      | 3              |
|                 | <b>rs1056892</b>                      | 44               | 44                        | 10                      | 0              |
| <b>ABCC1</b>    | <b>rs4148350</b>                      | 87               | 10                        | 0                       | 1              |
|                 | <b>rs246221</b>                       | 43               | 44                        | 10                      | 1              |
| <b>SLC28A3</b>  | <b>rs7853758</b>                      | 72               | 22                        | 2                       | 2              |
| <b>UGT2B7</b>   | <b>hCV32449742-<br/>C_32449742_20</b> | 19               | 42                        | 35                      | 2              |
