# Supplementary material for: Pharmacokinetic and pharmacodynamic study of doxorubicin in children with cancer: results of a “European Pediatric Oncology Off-patents Medicines Consortium” trial
Source: Springer Nature journal article supplement (doi:10.1007/s00280-016-3174-8), 2016-10-21
Supplement: MOESM1 [file 10937396]

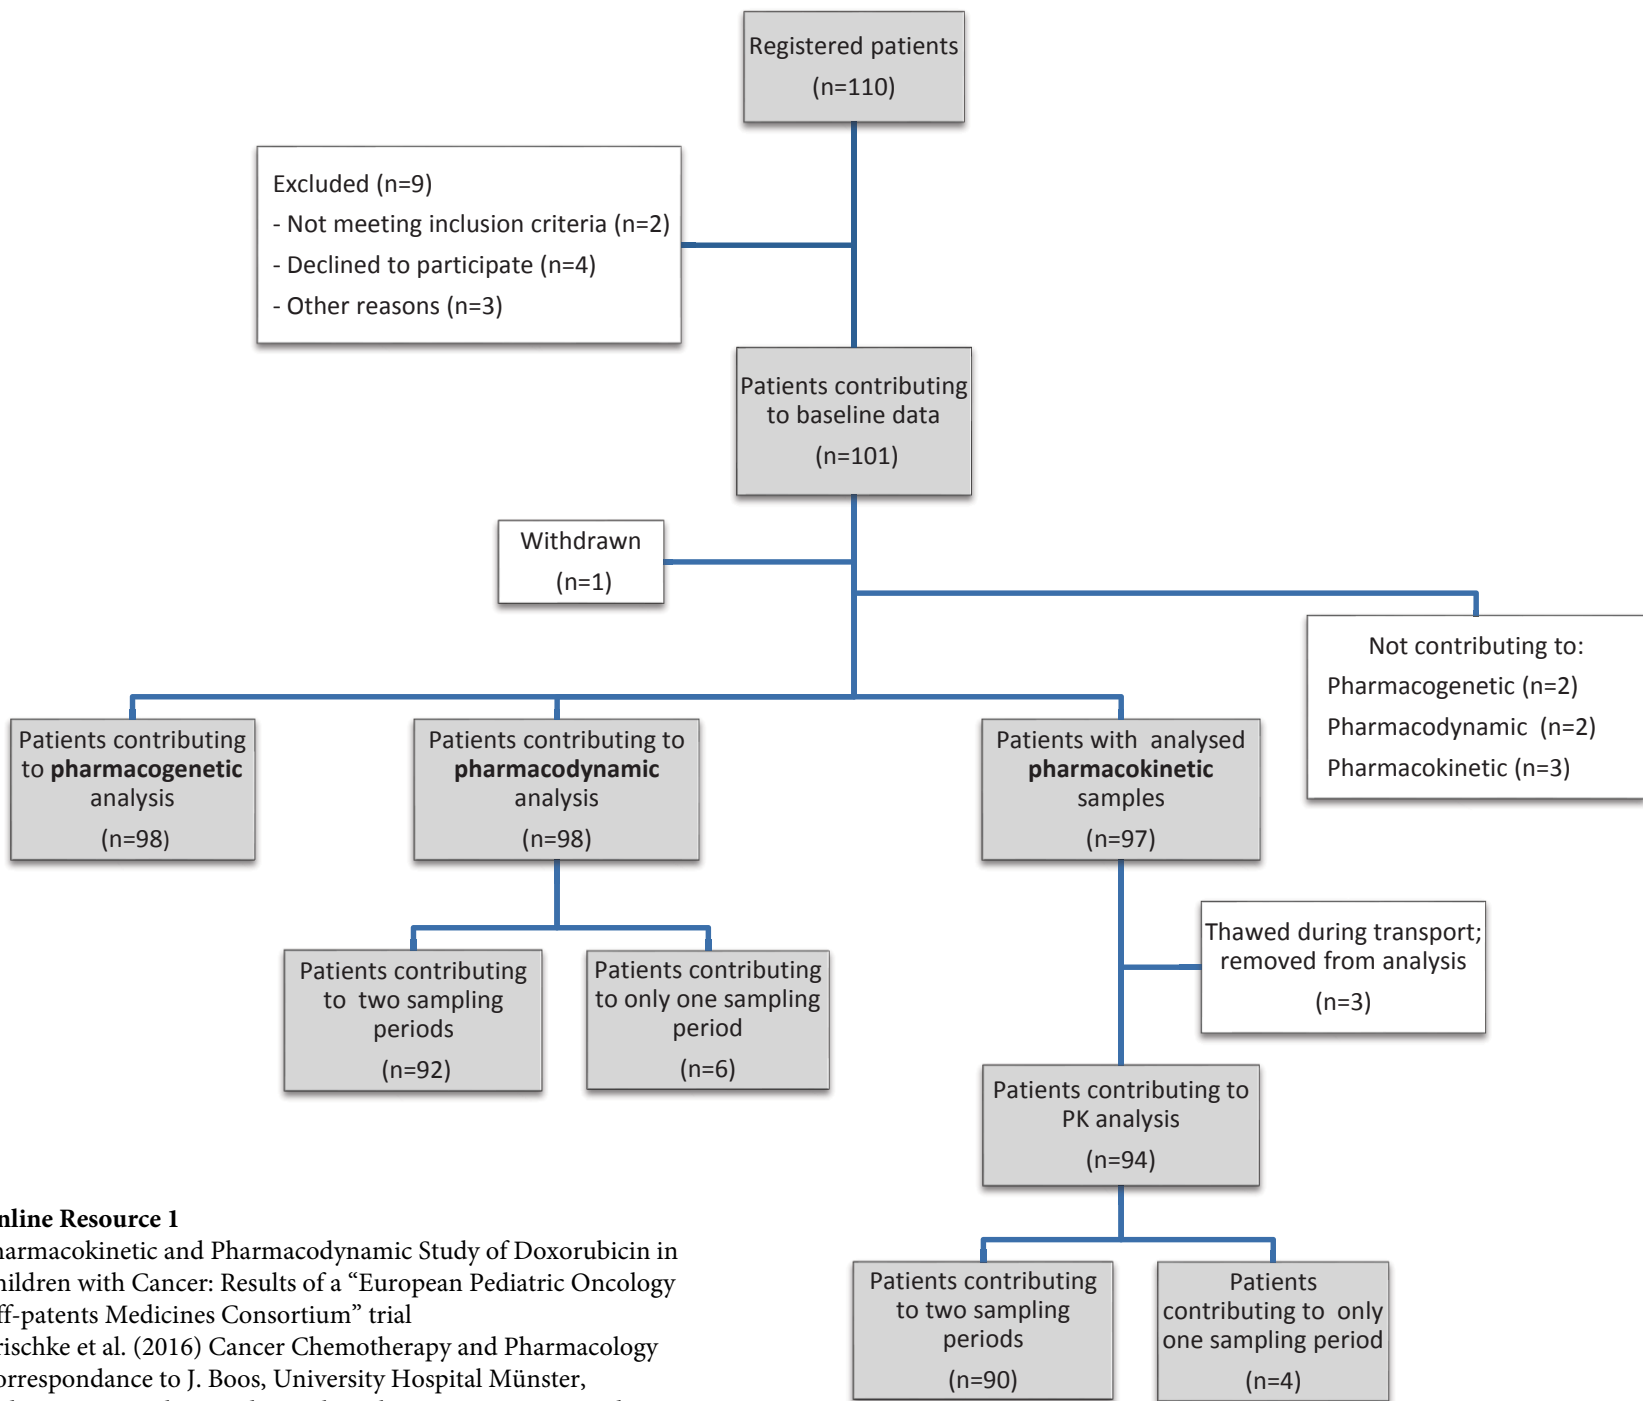

### Online Resource 1

Pharmacokinetic and Pharmacodynamic Study of Doxorubicin in Children with Cancer: Results of a “European Pediatric Oncology Off-patents Medicines Consortium” trial

Krischke et al. (2016) Cancer Chemotherapy and Pharmacology

Correspondance to J. Boos, University Hospital Münster,

Pediatric Hematology and Oncology, boosj@uni-muenster.de
