# Supplementary material for: Pharmacokinetic and pharmacodynamic study of doxorubicin in children with cancer: results of a “European Pediatric Oncology Off-patents Medicines Consortium” trial
Source: Springer Nature journal article supplement (doi:10.1007/s00280-016-3174-8), 2016-10-21
Supplement: MOESM2 [file 10937396]

## Online Resource 2:

Doxorubicin dosages and infusion times used in various paediatric oncology treatment protocols in Germany (GER), France (F), Italy (I) and United Kingdom (UK)

| Tumour type          | Country       | Protocol                                            | Protocol block                 | Doxorubicin dose                                          | Infusion time                 |
|----------------------|---------------|-----------------------------------------------------|--------------------------------|-----------------------------------------------------------|-------------------------------|
| <b>Wilms tumour</b>  | GER, UK, F, I | SIOP WT 2001                                        | AVD: Stage II, III, IV         | 50mg/m <sup>2</sup>                                       | ≥ 6h (GER)<br>4-6h (UK, I, F) |
|                      | GER, UK, F, I | SIOP WT 2001                                        | High Risk: Stage II, III, IV   | 50mg/m <sup>2</sup>                                       | ≥ 6h (GER)<br>4-6h (UK, I, F) |
| <b>Neuroblastoma</b> | GER           | NB 2004                                             | a) N4<br>b) N6                 | a) 15mg/m <sup>2</sup><br>b) 30mg/m <sup>2</sup>          | a) 30 min<br>b) 4 h           |
|                      | UK, I, F      | HR-NBL-1 (SIOPEN)                                   | TVD (high risk non responders) | 22.5mg/m <sup>2</sup> /day x2 (50mg/m <sup>2</sup> total) | 48 h                          |
|                      | F             | SFCE - (NB02 "like")<br>Non resectable localized NB | CADO                           | 1mg/kg x2                                                 | 6h                            |
| <b>Ewing sarcoma</b> | GER, UK, F    | EURO EWING 99                                       | VIDE                           | 20mg/m <sup>2</sup>                                       | 4 h                           |
|                      | I             | ISG/AIEOP EW-1                                      | a) VAC<br>b) VAI               | 40 mg/m <sup>2</sup>                                      | 4h                            |

| <b>Tumour type</b>              | <b>Country</b> | <b>Protocol</b>                                                     | <b>Protocol block</b>                  | <b>Doxorubicin dose</b>                                     | <b>Infusion time</b>                   |
|---------------------------------|----------------|---------------------------------------------------------------------|----------------------------------------|-------------------------------------------------------------|----------------------------------------|
| <b>RMS /soft tissue sarcoma</b> | GER            | CWS 2002 P (soft-tissue sarcoma, incl. rhabdomyosarcoma)            | VAIA III                               | 2x 20mg/m <sup>2</sup>                                      | 2x 3 h                                 |
|                                 | UK, F, I       | RMS 2005 (STS 2006 04) rhabdomyosarkoma                             | High risk                              | 30mg/m <sup>2</sup> x2 (=60mg/m <sup>2</sup> /course)       | 4h                                     |
|                                 | UK, F, I       | NRSTS 2005 (STS 2006 03) Localised, Non-Rhabdo Soft tissue sarcomas | IA                                     | 37.5mg/m <sup>2</sup> /dayx2 (=75mg/m <sup>2</sup> /course) | 4-6h (UK)<br>10mg/hour (F)<br>1-4h (I) |
| <b>ALL</b>                      | GER            | ALL-BFM 2000                                                        | protocol II                            | 30mg/m <sup>2</sup> (weekly, 4 doses)                       | 1 h                                    |
|                                 | I              | AIEOP LLA 2000                                                      | protocol II                            | 30mg/m <sup>2</sup> (weekly, 4 doses)                       | 1 h                                    |
|                                 | UK             | UKALL2003                                                           | Delayed Intensification                | 25mg/ m <sup>2</sup>                                        | 1 h                                    |
|                                 | F              | FRALLE 2000                                                         | a) Consolidation<br>b) Intensification | 40mg/m <sup>2</sup>                                         | 1 h<br>1 h                             |
