# Supplementary material for: Pharmacokinetic and pharmacodynamic study of doxorubicin in children with cancer: results of a “European Pediatric Oncology Off-patents Medicines Consortium” trial
Source: Springer Nature journal article supplement (doi:10.1007/s00280-016-3174-8), 2016-10-21
Supplement: MOESM4 [file 10937396]

## Online Resources 4

Spearman's rank correlations between different cardiotoxicity biomarkers.

|                   | <b>Troponin T</b> | <b>Troponin I</b> | <b>NT-proANP</b> | <b>BNP</b>   |
|-------------------|-------------------|-------------------|------------------|--------------|
| Sampling Time A   |                   |                   |                  |              |
| <b>Troponin I</b> | <b>0.713</b>      |                   |                  |              |
| <b>NT-proANP</b>  | 0.454             | 0.282             |                  |              |
| <b>BNP</b>        | 0.216             | 0.206             | <b>0.567</b>     |              |
| <b>NT-proBNP</b>  | 0.455             | 0.406             | <b>0.514</b>     | <b>0.604</b> |
| Sampling Time B   |                   |                   |                  |              |
| <b>Troponin I</b> | <b>0.589</b>      |                   |                  |              |
| <b>NT-proANP</b>  | 0.413             | 0.293             |                  |              |
| <b>BNP</b>        | 0.310             | 0.285             | <b>0.682</b>     |              |
| <b>NT-proBNP</b>  | 0.395             | 0.273             | <b>0.631</b>     | <b>0.746</b> |
| Sampling Time C   |                   |                   |                  |              |
| <b>Troponin I</b> | <b>0.654</b>      |                   |                  |              |
| <b>NT-proANP</b>  | 0.473             | 0.391             |                  |              |
| <b>BNP</b>        | 0.200             | 0.195             | <b>0.485</b>     |              |
| <b>NT-proBNP</b>  | 0.332             | 0.428             | <b>0.538</b>     | <b>0.623</b> |
| Sampling Time D   |                   |                   |                  |              |
| <b>Troponin I</b> | <b>0.576</b>      |                   |                  |              |
| <b>NT-proANP</b>  | 0.438             | 0.315             |                  |              |
| <b>BNP</b>        | 0.342             | 0.281             | <b>0.753</b>     |              |
| <b>NT-proBNP</b>  | 0.436             | 0.446             | <b>0.673</b>     | <b>0.811</b> |
| Sampling Time E   |                   |                   |                  |              |
| <b>Troponin I</b> | <b>0.688</b>      |                   |                  |              |
| <b>NT-proANP</b>  | 0.481             | 0.225             |                  |              |
| <b>BNP</b>        | 0.225             | 0.290             | <b>0.525</b>     |              |
| <b>NT-proBNP</b>  | 0.387             | 0.331             | <b>0.592</b>     | <b>0.757</b> |
